# Supplementary material for: Proteasomal degradation of human SERINC4: A potent host anti-HIV-1 factor that is antagonized by nef
Source: PubMed Central journal article supplement — Curr Res Virol Sci. Author manuscript; Available in PMC 2021 Jan 28. (PMC7842267; doi:10.1016/j.crviro.2020.100002), 2020-12-08
Supplement: NIHMS1656036-supplement-Supplemental_Figure_and_Table.pdf [file NIHMS1656036-supplement-Supplemental_Figure_and_Table.pdf]

## **Supplemental Materials**

**Supplemental Figure 1.** Ser4 amino acid sequences from human, gorilla (gor), macaque (mac), murine (m), and rat Ser4 proteins are aligned. Red, blue, black, and dash indicate conserved, partially conserved, non-conserved, or non-existing residues, respectively.

**Supplemental Table 1.** Primers used for creating Mut-1 to 8 by overlapping PCR are shown.

Supplemental Figure 1

1 90  
hSer4 MVGAKAGPSPGTSLGLAQQHSGGSSVLVKSFFCQVCCCGPAPCASCHSRWPSLTASTCSRLFYILLHV GASAI CCLLLSR TVVERVWGK  
gorSer4 MVGAKAGPSPGTSLGLAQQHSGGSSVLVKSFFCEVCCCGPAPCASCHSRWPSLTASTCSRLFYILLHV GASAI CCLLLSR TVVERVWGK  
macSer4 MVGAKAGLSPSTSLG LAQQRSGGSSVLVKSFFCQVCCCGPAPCASCHSRWPSLTASTCSRLFYILLHV GASAI CCLLLSR TVVERVWGK  
mSer4 MMGAKVVTGRSTTQGLAQQHGVS NVV-ETPFNQASCCGPVSWTSGCHS----LTERCSRLLYILLHV GASAI CCLLLSK TVVERVWGK  
ratSer4 MGAKDITGRSTTQGF AQQHGVS DVVVKT PFYQVSCCGPVSWTSGCHS----LTESTCSRLLFYILLHMGASAI CCLLLSK TVVERVWGK  
Consensus mmGAK. . tgrsTtqGLAQQhgV s. VvvktPF. #vsCCGPvswtSgCHS. . . . LTestCSRLLFYILLHV GASAI CCLLLSK TVVERVWGK

91 180  
hSer4 THRIQMPGSLCAHLFGLSDCPVLSGSGAVYRVCAGTATFHLLQAVLLVHLHSPTS PRAQLHNSFWLLKLLFLLGLCAIAFCIPDEHLFPA  
gorSer4 THRIQMPGSLCAHLFGLSDCPVLSGSGAVYRVCAGTATFHLLQAVLLVHLHSPTS PRAQLHNSFWLLKLLFLLGLCAIAFCIPDEHLFPA  
macSer4 THRIQMPGSLCAHLFGLSDCPVLSGSGAVYRVCAGTATFHLLQAVLLVHLHSPTS PRAQLHNSFWLLKLLFLLGLCAIAFCIPDEHLFPA  
mSer4 AHGIQMPSVLCAHLFGS SDCPVLSGSGAVYRVCAGTATFHLLQAVLLVHLHSPTN PRAQLHNSFWSLKLLFLLGLCVVAFICIPDEHLFPA  
ratSer4 AHGIQMPSVLCAHLFGNSDCPVLSGSGAVYRVCAGTATFHLLQAVLLVHLHSPTS PRAQLHNSFWSLKLLFLLGLCTAFCIPDEHLFPA  
Consensus aHgIQMPsvLCAHLFG. SDCPVLSGSGAVYRVCAGTATFHLLQAVLLVrLHSPTS PRAQLHNSFWsLKLLFLLGLC. . AFCIPDEhLFPA

181 270  
hSer4 WHYIGICGGFAFILLQLVLITAFASWKNKNWQTGAAQDCSWFLAVLLATLGFYSMAGVAVLLFHY YTHPAGCLLNKMLLSLHLCFCGLI  
gorSer4 WHYIGICGGFAFILLQLVLITAFASWKNKNWQTGAAQDCSWFLAVLLATLGFYSMAGVAVLLFHY YTHPAGCLLNKMLLSLHLCFCGFI  
macSer4 WHYIGICGGFAFILLQLVLITAFASWKNKNWQTGAAQDCSWFLAVLLATLGFYSMAGVAVLLFRY YTHPAGCLLNKMLLSLHLCFCGLI  
mSer4 WHYIGICGGFTFILLQLVLITAFASWKNKNWQTGAAQDCSWLGVSLATLGFYSMAGVAVLLFHQYTHPDGCLLNKMLLSLHLCFCGLI  
ratSer4 WHYIGICGGFTFILLQLVLITAFASWKNKNWQTGAAQDCSWFLGVLATLGFYSMAGVAVLLFHHYTHPDGCLLNKMLLSLHLCFCGLL  
Consensus WHYIGICGGftFILLQLVLITAFaQsWKNKNWQTGAAQDCSWflgVlLATLGFYSMAGVAVLLfh. YTHPDGCLLNKMLLSLHLCFCGLl

271 360  
hSer4 SFLSIAPCIRLKPQRSGLLQASVISCYIMYLTFSALSSRPPE RVILQGQNHTLCLPGLSKMEPQTPDISLAMLSASIMYACVLFACNEAS  
gorSer4 SFLSIAPCIRLKPQRSGLLQASVISCYIMYLTFSALSSRPPE RVILQGQNHTLCLPGLSKMEPQTPDISLAMLSASIMYACVLFACNEAS  
macSer4 SFLSIAPCIRLKPQRSGLLQASVISCYIMYLTFSALSSRPPE RVILQGQNHTLCLPGLSKMEPQTPDISLAMLSASIMYACVLFACNEAS  
mSer4 SLLSIAPCIRLRKQPN SGLLQASII SCYIMYLTFSALSSRPPE TIFQGNHTLCLPGRNKMEPQIPDTSVAVFSAGIMYACVLFACNEAS  
ratSer4 SLLSIAPCIRLRQPN SGLLQASII SCYIMYLTFSALSSRPPE TIFQGNHTLCLPGQNKMEPQIPDASVAVFSASIMYACVLFACNEAS  
Consensus SLLSIAPCIRlkQpNsGllQAS! ISCYIMYLTFSALSSRPPE! ifQGNHTLCLPG. nKMEPqiPD. SvAvfSAsIMYACVLFACNEAS

361 450  
hSer4 YLAEVFGPLWIVKVYSYEFQKPSLCFCCPETVEADKQGRGGAARPADQETPPAPPVQVQHLSYNYS AFHFVFFLASLYVMVTLTNWFSYE  
gorSer4 YLAEVFGPLWIVKVYSYEFQKPSLCFCCPETVEADKQGRGGAARPADQETPPAPAVQVQHLSYNYS AFHFVFFLASLYVMVTLTNWFSYE  
macSer4 YLAEVFGPLWIVKVYRYEFQKPSLCFCCPEIVEADEGQRGGAARPADQETPPAPSVQVQHLSYNYS AFHFVFFLASLYVMVTLTNWFSYE  
mSer4 YLAELFGPLWIKVYKYEYEFQKPSVCFCCPQTVPEPDGQ-RSRARSADQETPPAAQVQSQHLSYSYSGFHF AFFLASLYVMVTLTNWFSYE  
ratSer4 YLAQLFGPLWIKVYKYEYEFQKPSVCFCCPQTVPEPDGQ-GSRARPADQETPPAAQVQSQHLSYSYSGFHF AFFLASLYVMVTLTNWFSYE  
Consensus YLA#lFGPLWI!KVYkYEFQKPSvCFCCP#tVep#dGQ. gsrARPADQETPPAAqVqsQHLSYSYSgFHFaFFLASLYVMVTLTNWFSYE

451 519  
hSer4 GAELEKTFIKGSWATFWVKVASCWACVLLYLGLLLAPLCWPP TQKPQLILRRRRH-RIISPDNKYPPV  
gorSer4 EALEKTFIKGSWATFWVKVASCWACVLLYLGLLLAPLCWPP TQKPQLILRRRRH-RVISPDNKYPPV  
macSer4 GAELEKTFIKGSWATFWVKVASCWACVLLYLGLLLAPLCRSPTQKPQLILRRRRRHRIISPDNKYPPV  
mSer4 EALEKTFIKGSWATFWVKVASCWACVLLYLGLLLAPLLAPHSESPPP  
ratSer4 EALEKTFIKGSWATFWVKVASCWACVLLYLGLLLAPLLAHHSESPPP  
Consensus eAELEKTFtKGSWATFWVKVASCWACVLLYLGLLLAPLlaphs#sPpP.....

Supplemental Table 1. Primers for overlapping PCR

| Name        | Sequences                                         | Introduction                                       |
|-------------|---------------------------------------------------|----------------------------------------------------|
| CMV.S4_S    | 5' CAGTACACCAATGGGCGTGGATAG 3'                    | 5' terminal primer for all vectors                 |
| Myc_A       | 5' CCAGATCCTCTTCTGAGATGAGTTTCT 3'                 | 3' terminal primer for vectors based on pCMV-mSer4 |
| hSer4_880_A | 5' CAGATACATGATATAGCAGCTGATGA 3'                  | 3' terminal primer for vectors based on pCMV-hSer4 |
| mS4_ex1_S   | 5' AACCCCCTTCAATCAGGTGTGCTGCTGTGGGCCTGCTC 3'      | for Mut3 and Mut6                                  |
| mS4_ex1_A   | 5' CCCACAGCAGCACACCTGATTGAAGGGGGTTTCCACTAC 3'     | for Mut3 and Mut6                                  |
| mS4_ex2_S   | 5' TGGGGCAAAGCACATGGGATCCAGATGCCCTCGGGGTGT 3'     | for Mut1 and Mut5                                  |
| mS4_ex2_A   | 5' CCGAGGGCATCTGGATCCCATGTGCTTTGCCCCAGACC 3'      | for Mut1 and Mut5                                  |
| hS4_ex1_S   | 5' GTCCCTTCTGTCAGGCATCCTGCTGTGGACCTGTTTCT 3'      | for Mut4 and Mut5                                  |
| hS4_ex1_A   | 5' GTCCACAGCAGGATGCCTGACAGAAGGGACTTTTCACT 3'      | for Mut4 and Mut5                                  |
| hS4_ex2_S   | 5' GGCAAGACACACAGGATCCAGATGCCCTCAGTGCTATGT 3'     | for Mut2 and Mut6                                  |
| hS4_ex2_A   | 5' CTGAGGGCATCTGGATCCTGTGTGTCTTGCCCCACACCCT 3'    | for Mut2 and Mut6                                  |
| hS4_S2NT_S  | 5' GGACCCCCGGGCTCCGCGGGCACAGCTGCATAATAGCTTCT 3'   | for Mut-7                                          |
| hS4_S2NT_A  | 5' CAGCTGTGCCCGCGGAGCCCGGGGTCCCGGCTGCTGCTCA 3'    | for Mut-7                                          |
| hS4_S5NT_S  | 5' AAAGTTGTAGACCGCGGGCACAGCTGCATAATAGCTTCTGG 3'   | for Mut-8                                          |
| hS4_S5NT_A  | 5' AGCTGTGCCCGCGGTCTACAACCTTTTGCTGTTGTTGATTTTC 3' | for Mut-8                                          |
